# Supplementary material
Source: publisher figshare collection journal article supplement (https://acs.figshare.com/ndownloader/files/30871450)
Supplement: Supplementary file 1 [file 30871450]

## Sheet: Table S6 
Table S6. Supplemental Methods. LC-MS/MS and SAINT analysis parameters
	Hardware
HPLC	Dionex Ultimate 3000 RSLC nano (Thermo Scientific)
Spectrometer	Orbitrap Fusion Lumos (Thermo Scientific)
Source	“Flex” Nanospray (Thermo Scientific)
Software	Xcalibur 4.0.27.10 (Thermo Scientific); Fusion Lumos 2.1 Build 1565 (Thermo Scientific); DCMSLink 2.14 Build 3818 (Thermo Scientific)
	HPLC Conditions
Solvent A	98% water with 0.1% formic acid, 2% acetonitrile with 0.1% formic acid
Solvent B	98% acetonitrile with 0.1% formic acid, 2% water with 0.1% formic acid
Flow rate	300 nanolitres per minute
Gradient	5% - 36% B over 15 minutes
Precolumn	C18 PepMap100 (Thermo Scientific) 300 µm i.d. x 5mm
Column	C18 2µ, 100 Å Acclaim PepMap RSLC (Thermo Scientific) 75 µm i.d. x 15 cm
	Tandem MS Conditions
Design	Data Dependent Acquisition of MS2 spectra from most abundant ions in MS
Dynamic Exclusion	2 counts within 10 s triggers exclusion for 60 s
MS
Survey Scan	m/z 400-1500 at 120,000 resolution
Target AGC	400000
Internal Calibration	Yes (Easy-IC)
MS2
Charge State	Required, +2 to +7
Isolation width	1.6
Activation method	CID
NCE	35
Q	0.25
Max injection time	35 ms
Other	Inject ions for all available parallelizable time: enabled
	MaxQuant Parameters
Software Version	1.6.7.0
Experiment Type	Standard
Multiplicity	1
Digestion	Trypsin/P
Max. Missed	2
Variable modifications	Protein N-term acetylation, oxidation of methionine
Fixed modifications	Carbamidomethylation of cysteine
Label-free quant (LFQ)	enabled
Reference proteome(s)	UniProt human (version 2019-09-17), contaminants
Max. Peptide Mass	5000
PSM / Protein FDR	0.01 / 0.01
Match between runs	Enabled
	All other parameters left at default settings
	SAINT Parameters
Software	CRAPome.org (now https://reprint-apms.org/)
Implementation	SAINTexpress
CRAPome controls	CC532
Number of virtual controls	10
n-burn	2000
n-iter	4000
LowMode	0
MinFold	1
Normalize	1
FC-B parameters	Combining replicates: Geometric; Number of virtual controls: 10
